# Supplementary material for: A High-Quality Genome Sequence of the Penicillium oxalicum 5-18 Strain Isolated from a Poplar Plantation Provides Insights into Its Lignocellulose Degradation
Source: Int J Mol Sci. 2023 Aug 13;24(16):12745. doi: 10.3390/ijms241612745 (PMC10454814; doi:10.3390/ijms241612745)
Supplement: Supplementary file 1 [file ijms-24-12745-s001.zip › Tables.xlsx]

## Sheet: TableS1
Table S1 Strains used in the molecular phylogenetic analysis in this study.
A: Strains and GenBank accession numbers for ITS region.
Species	Collection number	GenBank accession number
		ITS
P. oxalicum 5-18	CCTCC AF 2021051	MW487229
P. camponotum	CBS 140982	NR158823.1
P. terrarumae	GACPHGUPd2021	NR172736.1
P. subrubescens	CBS 132785	NR111863.1
P. annulatum	CBS 135126	NR138303.1
P. rolfsii	NRRL 1078	AF033439.1
P. reticulisporum	NRRL 3447	NR121231.1
P. tanzanicum	CBS 140968	NR158820.1
P. bissettii	CBS 140972	NR158821.1
P. vasconiae	CBS 339.79	NR138291.1
P. oxalicum	114-2	KF152942.1
P. soosanum	CCF3778	NR173354.1
P. ucsense	2HH	OM914583.1
P. amphipolaria	CBS 140997	NR158827.1
P. singorense	CBS 138214	NR137877.1
P. guaibinense	HURB 18573	NR172038.1
P. vanderhammenii	CBS 126216	NR137577.1
P. penarojense	CBS 113178	NR138289.1
P. brevicompactum	NRRL 2011	NR121299.1
B: Strains and GenBank accession numbers for LSU region.
Species	Collection number	GenBank accession number
		LSU
P. cremeogriseum	ATCC18323	KU933422.1
P. brefeldianum	CBS 233.81	MH873094.1
P. levitum	CBS 345.48	MH867928.1
P. limosum	CBS 339.97	NG 069001.1
P. lineolatum	CBS 188.77	MH872815.1
P. daleae	CBS 114839	NG064184.1
P. abidjanum	CBS 246.67	NG064064.1
P. implicatum	CBS 184.81	NG067417.1
P. hispanicum	CBS 691.77	NG067413.1
P. sublateritium	CBS267.29	NG069622.1
P. oxalicum	114-2	KF152942.1
P. newtonturnerae	BRIP74909a	OP925817.1
P. pedernalense	CBS 140770	NG070045.1
P. brasilianum	CBS 253.55	NG069684.1
P. simplicissimum	CBS 372.48	MH867949.1
P. mariae-crucis	CBS 270.83	NG069791.1
P. uttarakhandense	NFCC I4808	MT026706.1
P. subarcticum	CBS 111719	MT365182.1
P. canariense	CBS 111720	NG 069870.1
P. stolkiae	CBS 315.67	NG069731.1
P. brevicompactum	CBS 257.29	NG069620.1

## Sheet: TableS2
TableS2 Comparison of the number of different CAZyme families in P. oxalicum 5-18 and other filamentous fungi
Phylum	Species	GHs	GTs	AAs	CEs	PLs	CBMs	All
Ascomycota	Penicillium oxalicum 5-18	227	88	50	51	7	16	439
	Penicillium oxalicum 114-2	206	96	51	26	7	62	448
	Penicillium chrysogenum	222	103	22	22	9	51	429
	Neurospora crassa	174	78	35	22	4	42	355
	Aspergillus nidulans	264	92	33	31	21	44	485
	Aspergillus niger	253	121	68	23	8	55	528
	Aspergillus oryzae	315	119	30	28	26	42	560
	Trichoderma reesei	210	90	61	61	6	45	473
Basidiomycota	Phanerochaete chrysosporium	170	70	81	20	1	71	413
	Postia placenta	130	24	29	15	1	33	245

## Sheet: TableS3 A 
TableS3 A: Comparison of the number of glycoside hydrolase (GH) domains in various fungal genomes
Phylum	Species	GH
		Total	1	2	3	5	6	7	9	10	11	12	13	15	16	17	18	19	20	23	24	25	26	27	28	29	30	31	32	33	35	36	37	38	39	42	43	45	47	51	53	54	55	62	63	64	65	67	71
Ascomycota	Penicillium oxalicum 5-18	227	4	6	15	13	1	3		3	5	3	15	3	10	4	13		1			1	1	2	11		4	7	2		3		1	1			14		6	2	1	1	7	2	1	1	1	1	5
	Penicillium oxalicum 114-2	206	4	6	14	9	1	3		3	5	3	4	3	12	5	15		1	1		1	1	2	11		4	6	2		3		1	1			8		6	3	1	1	3	2	1	1	1	1	5
	Penicillium chrysogenum	222	3	6	17	13	1	2		3	1	3	16	3	16	5	10		2			1	1	1	5		1	11	7	2	2	2	1	1	2	1	14		6	3	1	1	3	1	1	2	1	1	6
	Neurospora crassa	174	1	5	9	7	3	5		4	2	1	10	2	14	4	12		1			1	1		2		2	5	1		2	1	2	1			7	1	8	1	1	1	6		1	2		1	6
	Aspergillus nidulans	264	3	10	20	15	2	3		3	2	1	14	2	13	5	19		2		1	3	3	3	9			10	2		5	2	1	1			10		5	4	2	1	3	1	1		1	1	5
	Aspergillus niger	253	3	7	17	10	2	2		1	4	4	17	2	13	5	14		3				1	5	21	1	1	7	6	1	5	2	1	1			10		5	4	2	1	3	1	1		1	1	7
	Aspergillus oryzae	315	3	7	23	14	1	3		4	4	4	17	3	13	5	18		3		2	1	1	3	21			10	4	1	7	3	1	1			20		5	3	1	1	4	2	1		1	1	8
	Trichoderma reesei	210	2	7	13	8	1	2		1	3	2	5	2	16	4	20		3		1	1		5	4		5	4			1	1	2	1	1		2	1	8			2	6	1	2	3	2	1	4
Basidiomycota	Phanerochaete chrysosporium	170	2	2	11	15	1	8	1	6	1	2	7	2	22	2	11		4	1	1	1		3	5		2	6			3		2	1			3	1	5	2	1		2		1				3
	Postia placenta	130	2	5	8	12				1		2	3	2	24	2	15		2	2				2	7			6			2		7	1				1	7	2			1		2				4
[truncated: 35 more columns]

## Sheet: TableS3 B
TableS3 B: Glycosyl transferase (GT) domains
Phylum	Species	GT
		Total	1	2	3	4	5	8	15	17	20	21	22	24	25	28	31	32	33	34	35	39	41	48	49	50	55	57	58	59	62	64	66	69	71	76	90	NC
Ascomycota	Penicillium oxalicum 5-18	88	5	15	1	6		2	4		6	1	4	1	1			4	1	4	1	4		1		1		2	1	1	4		2	4	4	1	7
	Penicillium oxalicum 114-2	96	5	15	1	7	2	4	3		5	1	4	1	1		3	8	1	3	1	3	2	1		1		2	1	1	3		1	4	4	1	7
	Penicillium chrysogenum	103	6	13	1	5	4	5	3		9	1	4	1	3		6	9	1	3	1	3	1	1		1		2	1	1	3		1	2	3	1	6	2
	Neurospora crassa	78	6	11	1	6	2	2	5	1	3	1	3	1	1		3	4	1	2	1	3	1	1		1	1	2	1	1	3		1	2	1	1	3	2
	Aspergillus nidulans	92	9	12	1	7	2	4	3		3	1	4	1	4		5	7	1	3	1	3	1	1		1		2	1	1	3		1	3	2		2	3
	Aspergillus niger	121	12	18	1	8	5	4	3		6	1	3	1	5		6	11	1	3	1	3	1	1		1		2	1	1	3		1	6	4	1	3	4
	Aspergillus oryzae	119	9	17	1	9	3	4	3		6	1	4	1	5		11	8	1	2	1	3	1	1		1		2	1	1	3		1	4	5	2	4	4
	Trichoderma reesei	90	5	9	1	5		3	4	1	4	3	4	1	1	1	4	11	1	3	1	3	1	1		1		2	1	1	3	2	1	4	1	1	6
Basidiomycota	Phanerochaete chrysosporium	70	9	13	1	4	1	9	2	1	3	1	4	1			1	1	1		1	3	1	2		1		2	1	1			1	2		1	1
	Postia placenta	24	1	7		2		8	1		1		1																				1	2

## Sheet: TableS3 C
TableS3 C: Auxiliary activities (AA) domains
Phylum	Species	AA
		Total	1	2	3	4	5	6	7	8	9	10	11	12	13	16
Ascomycota	Penicillium oxalicum 5-18	50	3	2	13	4		1	18		4		3		1	1
	Penicillium oxalicum 114-2	51	6	2	12	3		1	19	1	4		1		1
	Penicillium chrysogenum	22	2		1	1	2	1			4		9		2
	Neurospora crassa	35	8		2		1			2	14		4	3	1
	Aspergillus nidulans	33	2		16					2	9		2		2
	Aspergillus niger	68	16		31	1		2	4	4	7		3
	Aspergillus oryzae	30	4		6		2	1		2	8		5		1	1
	Trichoderma reesei	61	4	6	15	4	1	1	22		3		4	1
Basidiomycota	Phanerochaete chrysosporium	81	4	16	39			4		2	16
	Postia placenta	29	6	1	18		2				2

## Sheet: Table S3 D
TableS3 D: Carbohydrate esterase (CE) domains
Phylum	Species	CE
		Total	1	2	3	4	5	7	8	9	10	12	14	15	16	18	NC
Ascomycota	Penicillium oxalicum 5-18	51	4	1		5	4		5	1	26	2			3
	Penicillium oxalicum 114-2	26	5	1		6	4		4	1		2			3
	Penicillium chrysogenum	22	1		4	5	4		2	1		2		1	1		1
	Neurospora crassa	22	6		3	4	3		1	1		1		1	1		1
	Aspergillus nidulans	31	2		5	7	4		3	1		2			3		4
	Aspergillus niger	23	2			5	5		3	1		2			2		3
	Aspergillus oryzae	28	1			3	5		5	1		4			2	2	5
	Trichoderma reesei	61	12		2	4	4	1		1	30	2	2	1	2
Basidiomycota	Phanerochaete chrysosporium	20	4			4			2	1				2	7
	Postia placenta	15				2			4	3				2	4

## Sheet: Table S3 E
TableS3 E: Polysaccharide lyase (PL) domains
Phylum	Species	PL
		Total	1	3	4	7	8	9	11	14	20	22	26	27
Ascomycota	Penicillium oxalicum 5-18	7	3		3								1
	Penicillium oxalicum 114-2	7	3		3								1
	Penicillium chrysogenum	9	5	1	3
	Neurospora crassa	4	1	1	1				1
	Aspergillus nidulans	21	8	5	4			1	1		2
	Aspergillus niger	8	6		2
	Aspergillus oryzae	26	12	3	4	1		1			2		2	1
	Trichoderma reesei	6		1		2	1				2
Basidiomycota	Phanerochaete chrysosporium	1						1
	Postia placenta	1								1

## Sheet: Table S3 F
TableS3 F: Carbohydrate-binding module (CBM) domains
Phylum	Species	CBM
		Total	1	5	6	9	10	13	14	16	18	19	20	21	24	32	35	37	38	42	43	46	48	50	52	63	66	67	87	91
Ascomycota	Penicillium oxalicum 5-18	16			1								4	1	5					1	1					1		2
	Penicillium oxalicum 114-2	62	20								10		4	1	4		2			1	2	1	2	11		2		2
	Penicillium chrysogenum	51	6						1		12		3	1	8	2	1			1	3		2	10		1
	Neurospora crassa	42	19					2			3		2	1	8	1			1		1		1	2	1
	Aspergillus nidulans	44	7						1		17		4	1	2		3			1	3		1	3		1
	Aspergillus niger	55	8					1	1		13		1	1	6		2			1	4		3	13		1
	Aspergillus oryzae	42	3					2	1		6	1	1	1	6	2	2			1	5		2	3		1			2	3
	Trichoderma reesei	45	14					3			7		2	1	2	1				2	2		1	8			2
Basidiomycota	Phanerochaete chrysosporium	71	36	4		1	8	1		2	2				1			1				12
	Postia placenta	33		5				19			2		2	3							1		1

## Sheet: TableS4
Table S4 Comparison of plant cell wall degrading-enzyme (PCWDE) genes in various CAZyme subfamilies of isolate 5-18 and 9 other filamentous fungi
Cellulose	GH							AA	sum														function	EC number	in families	Penicillium oxalicum 5-18	Penicillium oxalicum 114-2	Penicillium chrysogenum	Neurospora crassa	Aspergillus nidulans	Aspergillus niger	Aspergillus oryzae	Trichoderma reesei	Phanerochaete chrysosporium	Postia placenta
	1	3	5	6	7	12	45	9															𝛽-1,4-glucanase	3.2.1.4	GH 5, 6, 7, 12, 45	20	16	19	17	22	18	22	14	27	40
Penicillium oxalicum 5-18	4	15	13	1	3	3		4	43														cellulose 1,4-𝛽-cellobiohydrolase (non-reducing end)	3.2.1.91	GH 6	1	1	1	3	2	2	1	1	1	-
Penicillium oxalicum 114-2	4	14	9	1	3	3		4	38													Cellulose	cellulose 1,4-𝛽-cellobihydrolase (reducing end)	3.2.1.176	GH 7	3	3	2	5	3	2	3	2	8	-
Penicillium chrysogenum	3	17	13	1	2	3	-	4	43														𝛽-glucosidase	3.2.1.21	GH 1, 3	19	18	20	10	23	20	26	15	13	13
Neurospora crassa	1	9	7	3	5	1	1	14	41														lytic polysaccharide monooxygenase	-	AA9	4	4	4	14	9	7	8	3	16	4
Aspergillus nidulans	3	20	15	2	3	1	1	9	54
Aspergillus niger	3	17	10	2	2	4	-	7	45
Aspergillus oryzae	3	23	14	1	3	4		8	56
Trichoderma reesei	2	13	8	1	2	2	1	3	32
Phanerochaete chrysosporium	2	11	15	1	8	2	1	16	56
Postia placenta	2	8	12	-	-	2	-	2	26
Xylan	GH													CE						sum			function	EC number	in families	Penicillium oxalicum 5-18	Penicillium oxalicum 114-2	Penicillium chrysogenum	Neurospora crassa	Aspergillus nidulans	Aspergillus niger	Aspergillus oryzae	Trichoderma reesei	Phanerochaete chrysosporium	Postia placenta
	2	3	10	11	27	35	36	43	51	54	62	67	115	1	3	4	5	6	15				endo-1,4-𝛽-xylanase	3.2.1.8	GH 10, 11	8	8	4	6	5	5	8	4	7	4
Penicillium oxalicum 5-18	6	15	3	5	2	3		14	2	1	2	1		4		5	4			67			xylan 1,4-𝛽-xylosidase	3.2.1.27	GH 3, 43	29	22	31	16	35	27	43	15	14	10
Penicillium oxalicum 114-2	6	14	3	5	2	3		8	3	1	2	1		5		6	4			63			α-L-arabinofuranosidase (non-reducing end)	3.2.1.55	GH 43, 51, 54, 62	19	14	19	9	20	16	26	5	5	4
Penicillium chrysogenum	6	17	3	1	1	2	2	14	3	1	1	1	-	1	4	5	4	-	1	67		Xylan	α-glucuronidase	3.2.1.139	GH 67, 115	1	1	1	2	2	1	1	2	1	0
Neurospora crassa	5	9	4	2	-	2	1	7	1	1	-	1	1	6	3	4	3	-	1	51			α-1,4-galactosidase	3.2.1.22	GH 27, 36	2	2	3	1	7	7	6	6	3	3
Aspergillus nidulans	10	20	3	2	3	4	4	15	2	1	2	1	1	2	5	7	4	-	-	86			𝛽-galactosidase	3.2.1.23	GH 2, 35	9	9	8	7	14	12	14	8	5	8
Aspergillus niger	7	17	1	4	5	5	2	10	4	1	1	1	-	2		5	5	-	-	70			acetyl xylan esterase	3.1.1.72	CE 1, 3, 4, 5	13	15	14	16	18	12	9	22	8	6
Aspergillus oryzae	7	23	4	4	3	7	3	20	3	1	2	1		1		3	5			87			feruloyl esterase	3.1.1.73	CE 1	4	5	1	6	2	2	1	12	4	-
Trichoderma reesei	7	13	1	3	5	1	1	2		2	1	1	1	12	2	4	4		1	61			4-O-methyl-glucuronoyl methylesterase	3.1.1.-	CE 15	-	-	1	1	-	-		1	2	2
Phanerochaete chrysosporium	2	11	6	1	3	3	-	3	2	-	-	-	1	4		4		-	2	42
Postia placenta	5	8	1		2	2			2	-	-	-	-	-		2		-	2	24
Galactomannan	GH							sum															function	EC number	in families	Penicillium oxalicum 5-18	Penicillium oxalicum 114-2	Penicillium chrysogenum	Neurospora crassa	Aspergillus nidulans	Aspergillus niger	Aspergillus oryzae	Trichoderma reesei	Phanerochaete chrysosporium	Postia placenta
	2	5	26	27	35	36	134																mannan endo-1,4-𝛽-mannosidase	3.2.1.78	GH 5, 26，134	14	10	17	8	22	11	15	8	15	36
Penicillium oxalicum 5-18	6	13	1	2	3			25															𝛽-1,4-mannosidase	3.2.1.25	GH 2	6	6	6	5	10	7	7	7	2	6
Penicillium oxalicum 114-2	6	9	1	2	3			21														Galactomannan	α-1,6-galactosidase	3.2.1.22	GH 27, 36	2	2	3	1	7	7	6	6	3	3
Penicillium chrysogenum	6	13	1	1	2	2	3	28															𝛽-galactosidase	3.2.1.23	GH 2, 35	9	9	8	7	14	12	14	8	5	8
Neurospora crassa	5	7	1	-	2	1		16
Aspergillus nidulans	10	15	3	3	4	4	4	43
Aspergillus niger	7	10	1	5	5	2		30
Aspergillus oryzae	7	14	1	3	7	3		35
Trichoderma reesei	7	8		5	1	1		22
Phanerochaete chrysosporium	2	15	-	3	3	-		23
Postia placenta	5	12		2	2			21
Xyloglucan	GH														sum								function	EC number	in families	Penicillium oxalicum 5-18	Penicillium oxalicum 114-2	Penicillium chrysogenum	Neurospora crassa	Aspergillus nidulans	Aspergillus niger	Aspergillus oryzae	Trichoderma reesei	Phanerochaete chrysosporium	Postia placenta
	2	12	16	27	29	31	35	36	43	51	54	62	74	95									xyloglucan 𝛽-1,4-endoglucanase (xyloglucanase)	3.2.1.151	GH 12, 16, 74	13	15	19	16	16	18	17	20	27	26
Penicillium oxalicum 5-18	6	3	10	2		7	3		14	2	1	2		1	51								α-L-arabinofuranosidase (non-reducing end)	3.2.1.55	GH 43, 51, 54, 62	19	14	19	9	20	16	26	5	5	2
Penicillium oxalicum 114-2	6	3	12	2		6	3		8	3	1	2		1	47								α-D-xylosidase xylohydrolase (α-xylosidase)	3.2.1.177	GH 31	7	6	11	5	10	7	10	4	6	6
Penicillium chrysogenum	6	3	16	1	-	11	2	2	14	3	1	1	-	1	61							Xyloglucan	α-L-fucosidase	3.2.1.51	GH 29, 95	1	1	1	-	3	3	3	4	1
Neurospora crassa	5	1	14	-	-	5	2	1	7	1	1	-	1	-	38								α-1,3/1,4-fucosidase	3.2.1.111	GH 29, 95	1	1	1	-	3	3	3	4	1
Aspergillus nidulans	10	1	13	3	-	10	4	4	15	2	1	2	2	3	70								α-1,4-galactosidase	3.2.1.22	GH 27, 36	2	2	3	1	7	7	6	6	3	2
Aspergillus niger	7	4	13	5	1	7	5	2	10	4	1	1	1	2	63								𝛽-galactosidase	3.2.1.23	GH 2, 35	9	9	8	7	14	12	14	8	5	7
Aspergillus oryzae	7	4	13	3		10	7	3	20	3	1	2		3	76
Trichoderma reesei	7	2	16	5		4	1	1	2		2	1	2	4	47
Phanerochaete chrysosporium	2	2	22	3	-	6	3	-	3	2	-	-	3	1	47
Postia placenta	5	2	24	2		6	2			2					43
Starch	GH				AA	sum																	function	EC number	in families	Penicillium oxalicum 5-18	Penicillium oxalicum 114-2	Penicillium chrysogenum	Neurospora crassa	Aspergillus nidulans	Aspergillus niger	Aspergillus oryzae	Trichoderma reesei	Phanerochaete chrysosporium	Postia placenta
	13	15	31	133	13																		α-amylase	3.2.1.1	GH 13	15	4	16	10	14	17	17	5	7	11
Penicillium oxalicum 5-18	15	3	7		1	26																Starch	glucan 1,4-α-glucosidase	3.2.1.3	GH 15	3	3	3	2	2	2	3	2	2	3
Penicillium oxalicum 114-2	4	3	6	1	1	15																	α-glucosidase	3.2.1.20	GH 13, 31	22	10	27	15	24	24	27	9	13	9
Penicillium chrysogenum	16	3	11	1	2	33																	lytic polysaccharide monooxygenase	-	AA13	1	1	2	1	2	-	1	-	-
Neurospora crassa	10	2	5	1	1	19																	amylo-α-1,6-glucosidase	3.2.1.33	GH133		1	1	1	2	1			1
Aspergillus nidulans	14	2	10	2	2	30
Aspergillus niger	17	2	7	1	-	27
Aspergillus oryzae	17	3	10		1	31
Trichoderma reesei	5	2	4		-	11
Phanerochaete chrysosporium	7	2	6	1	-	16
Postia placenta	3	2	6		-	11
Pectin	GH	PL	CE		Sum																		function	EC number	in families	Penicillium oxalicum 5-18	Penicillium oxalicum 114-2	Penicillium chrysogenum	Neurospora crassa	Aspergillus nidulans	Aspergillus niger	Aspergillus oryzae	Trichoderma reesei	Phanerochaete chrysosporium	Postia placenta
	28	1	8	12																			polygalacturonase	3.2.1.15	GH 28	11	11	5	2	9	21	21	4	5	8
Penicillium oxalicum 5-18	11	3	5	2	21																	Pectin	pectin/ pectate lyase	4.2.2.10/2	PL1	3	3	5	1	8	6	12
Penicillium oxalicum 114-2	11	3	4	2	20																		pectinesterase	3.1.1.11	CE8, 12	7	6	4	2	5	5	9	2	2	4
Penicillium chrysogenum	5	5	2	2	14																		rhamnogalacturonan lyase	4.2.2.-	PL4	3	3	3	1	4	2	4
Neurospora crassa	2	1	1	1	5
Aspergillus nidulans	9	8	3	2	22
Aspergillus niger	21	6	3	2	32
Aspergillus oryzae	21	12	5	4	42
Trichoderma reesei	4			2	6
Phanerochaete chrysosporium	5		2		7
Postia placenta	7		4		11

## Sheet: TableS5
Table S5 Overview of function annotation of CAZyme genes
Family HMM	Query ID	id	Description
GH55.hmm	g105.t1	g105	EPS33177.1 putative exo-beta-1,3-glucanase [Penicillium oxalicum 114-2]
CE1.hmm	g1066.t1	g1066	EPS34196.1 putative S-formylglutathione hydrolase [Penicillium oxalicum 114-2]
GH132.hmm	g1124.t1	g1124	EPS34254.1 SUN domain-containing protein [Penicillium oxalicum 114-2]
GH5_5.hmm	g1131.t1	g1131	AVQ10349.1 endo-beta-1,4-glucanase [Penicillium oxalicum]
GH47.hmm	g1153.t1	g1153	EPS34285.1 putative alpha-mannosidase [Penicillium oxalicum 114-2]
GT34.hmm	g1156.t1	g1156	RAQ48456.1 galactosyl transferase GMA12/MNN10 family protein [Aspergillus flavus]
GH5_22.hmm	g1169.t1	g1169	EPS34303.1 putative endo-beta-1,4-glucanase [Penicillium oxalicum 114-2]
CE1.hmm	g1180.t1	g1180	EPS34314.1 putative acetyl xylan esterase [Penicillium oxalicum 114-2]
GH43_24.hmm	g1181.t1	g1181	EPS34315.1 putative exo-beta-1,3-galactanase [Penicillium oxalicum 114-2]
GH28.hmm	g1187.t1	g1187	EPS34321.1 putative rhamnogalacturonan alpha-L-rhamnopyranohydrolase
GH93.hmm	g1231.t1	g1231	EPS34369.1 putative exo-alpha-L-1,5-arabinanase [Penicillium oxalicum 114-2]
GT90.hmm	g1251.t1	g1251	EPS34390.1 putative UDP-Xyl: (mannosyl) glucuronoxylomannan/galactoxylomannan beta-1,2-xylosyltransferase [Penicillium oxalicum 114-2]
CE4.hmm	g1286.t1	g1286	EPS34425.1 putative chitin deacetylase [Penicillium oxalicum 114-2]
GT2_Chitin_synth_1.hmm	g1304.t1	g1304	EPS34443.1 putative chitin synthase [Penicillium oxalicum 114-2]
CBM20.hmm	g1314.t1	g1314	AOS89805.1 glucoamylase [Penicillium oxalicum]
AA11.hmm	g1339.t1	g1339	EPS34477.1 chitin binding domain-containing protein [Penicillium oxalicum 114-2]
GH11.hmm	g1376.t1	g1376	EPS34514.1 putative endo-beta-1,4-xylanase [Penicillium oxalicum 114-2]
GH31.hmm	g1403.t1	g1403	EPS34541.1 putative alpha-glucosidase [Penicillium oxalicum 114-2]
GH18.hmm	g1406.t1	g1406	EPS34544.1 putative chitinase [Penicillium oxalicum 114-2]
GH18.hmm	g1428.t1	g1428	EPS34568.1 putative chitinase [Penicillium oxalicum 114-2]
GH1.hmm	g1431.t1	g1431	EPS34571.1 putative beta-glucosidase [Penicillium oxalicum 114-2]
GT20.hmm	g147.t1	g147	EPS33219.1 putative alpha,alpha-trehalose-phosphate synthase [UDP-forming] [Penicillium oxalicum 114-2]
GT2_Glycos_transf_2.hmm	g1497.t1	g1497	EPS34640.1 putative dolichyl-phosphate beta-glucosyltransferase [Penicillium oxalicum 114-2]
GT2_Chitin_synth_1.hmm	g15.t1	g15	EPS33084.1 putative chitin synthase [Penicillium oxalicum 114-2]
GT69.hmm	g1567.t1	g1567	EPS34715.1 putative GDP-Man: alpha-1,3-mannosyltransferase [Penicillium oxalicum 114-2]
GH3.hmm	g1598.t1	g1598	EPS34746.1 putative beta-xylosidase [Penicillium oxalicum 114-2]
GH17.hmm	g1666.t1	g1666	EPS34819.1 putative beta-1,3-glucanase [Penicillium oxalicum 114-2]
GH43_30.hmm	g1693.t1	g1693	EPS34847.1 putative alpha-L-arabinofuranosidase [Penicillium oxalicum 114-2]
GT32.hmm	g1694.t1	g1694	EPS34848.1 putative alpha-1,6-mannosyltransferase [Penicillium oxalicum 114-2]
GT32.hmm	g1694.t2
GT21.hmm	g1715.t1	g1715	EPS34872.1 putative UDP-Glc: ceramide beta-glucosyltransferase [Penicillium oxalicum 114-2]
GT25.hmm	g1740.t1	g1740	EPS34900.1 putative lipopolysaccharide beta-1,4-N-acetylgalactosaminyltransferase [Penicillium oxalicum 114-2]
GT15.hmm	g1752.t1	g1752	EPS34913.1 putative alpha-1,2-mannosyltransferase [Penicillium oxalicum 114-2]
GT15.hmm	g1752.t2
GT3.hmm	g1773.t1	g1773	EPS34934.1 putative glycogen synthase [Penicillium oxalicum 114-2]
GT71.hmm	g1775.t1	g1775	EPS34936.1 putative alpha-mannosyltransferase [Penicillium oxalicum 114-2]
GH5_4.hmm	g1840.t1	g1840	AFG25592.1 endoglucanase Cel5C [Penicillium decumbens]
CBM42.hmm	g1856.t1	g1856	EPS35023.1 putative alpha-L-arabinofuranosidase [Penicillium oxalicum 114-2]
GH54.hmm	g1856.t1
GH43_6.hmm	g1863.t1	g1863	EPS35030.1 putative alpha-L-arabinofuranosidase [Penicillium oxalicum 114-2]
GH13_40.hmm	g1875.t1	g1875	EPS29504.1 putative oligo-alpha-1,6-glucosidase [Penicillium oxalicum 114-2]
GH28.hmm	g1880.t1	g1880	EPS29509.1 putative bifunctional polygalacturonase/pectin methylesterase [Penicillium oxalicum 114-2]
CE8.hmm	g1880.t1
GH76.hmm	g1889.t1	g1889	EPS29518.1 putative alpha-1,6-mannanase [Penicillium oxalicum 114-2]
GH11.hmm	g1899.t1	g1899	AGW24299.1 xylanase 2 [Penicillium oxalicum]
GH93.hmm	g1909.t1	g1909	EPS29538.1 putative exo-alpha-L-1,5-arabinanase [Penicillium oxalicum 114-2]
GH13_25.hmm	g1953.t1	g1953	EPS29585.1 putative glycogen debranching enzyme [Penicillium oxalicum 114-2]
CE1.hmm	g201.t1	g201	EPS33276.1 putative feruloyl esterase [Penicillium oxalicum 114-2]
GH72.hmm	g2035.t1	g2035	EPS29668.1 putative beta-1,3-glucanosyltransglycosylase [Penicillium oxalicum 114-2]
GT62.hmm	g2061.t1	g2061	EPS29694.1 putative alpha-1,2 / alpha-1,6-mannosyltransferase [Penicillium oxalicum 114-2]
GH13_5.hmm	g2099.t1	g2099	EPS29733.1 putative alpha-amylase [Penicillium oxalicum 114-2]
GH13_1.hmm	g2100.t1	g2100	EPS29734.1 putative alpha-amylase [Penicillium oxalicum 114-2]
GH13_22.hmm	g2101.t1	g2101	EPS29735.1 putative alpha-1,3-glucan synthase [Penicillium oxalicum 114-2]
GH13_22.hmm	g2101.t1
GT48.hmm	g211.t1	g211	EPS33286.1 putative 1,3-beta-glucan synthase [Penicillium oxalicum 114-2]
GH17.hmm	g213.t1	g213	EPS33288.1 putative exo-beta-1,3-glucanase [Penicillium oxalicum 114-2]
GT2_Glycos_transf_2.hmm	g2148.t1	g2148	EPS29787.1 putative dolichyl-phosphate beta-D-mannosyltransferase [Penicillium oxalicum 114-2]
GH47.hmm	g219.t1	g219	EPS33294.1 putative alpha-mannosidase [Penicillium oxalicum 114-2]
GH3.hmm	g2219.t1	g2219	EPS29863.1 putative beta-N-acetylhexosaminidase [Penicillium oxalicum 114-2]
GH95.hmm	g2258.t1	g2258	EPS29908.1 putative alpha-1,2-L-fucosidase [Penicillium oxalicum 114-2]
GH1.hmm	g2259.t1	g2259	EPS29909.1 putative beta-glucosidase [Penicillium oxalicum 114-2]
GH18.hmm	g2297.t1	g2297	EPS29948.1 putative chitinase [Penicillium oxalicum 114-2]
CE5.hmm	g2314.t1	g2314	EPS29965.1 putative cutinase [Penicillium oxalicum 114-2]
GT4.hmm	g2335.t1	g2335	EPS29988.1 putative trehalose phosphorylase [Penicillium oxalicum 114-2]
GT1.hmm	g2342.t1	g2342	EPS29996.1 putative glycosyl transferase [Penicillium oxalicum 114-2]
GH18.hmm	g2489.t1	g2489	EPS30131.1 putative chitinase [Penicillium oxalicum 114-2]
GH72.hmm	g2492.t1	g2492	EPS30134.1 putative beta-1,3-glucanosyltransglycosylase [Penicillium oxalicum 114-2]
GH37.hmm	g253.t1	g253	EPS33334.1 putative alpha,alpha-trehalase [Penicillium oxalicum 114-2]
GH5_5.hmm	g2594.t1	g2594	EPS30243.1 putative endo-beta-1,4-glucanase [Penicillium oxalicum 114-2]
CE16.hmm	g2595.t1	g2595	EPS30244.1 putative carbohydrate acetylesterase [Penicillium oxalicum 114-2]
GH11.hmm	g2609.t1	g2609	ADB93806.1 xylanase I [Penicillium decumbens]
GT20.hmm	g2617.t1	g2617	EPS30268.1 putative alpha,alpha-trehalose-phosphate synthase [UDP-forming] [Penicillium oxalicum 114-2]
GH71.hmm	g2620.t1	g2620	EPS30272.1 putative alpha-1,3-glucanase [Penicillium oxalicum 114-2]
GH16.hmm	g2656.t1	g2656	EPS30312.1 putative chitin glucanosyltransferase [Penicillium oxalicum 114-2]
GH76.hmm	g2676.t1	g2676	EPS30335.1 putative alpha-1,6-mannanase [Penicillium oxalicum 114-2]
GT8.hmm	g2715.t1	g2715	EPS30375.1 putative galactinol synthase [Penicillium oxalicum 114-2]
CE16.hmm	g2731.t1	g2731	EPS30391.1 putative carbohydrate acetylesterase [Penicillium oxalicum 114-2]
GT24.hmm	g2793.t1	g2793	EPS30459.1 putative UDP-Glc: glycoprotein alpha-glucosyltransferase [Penicillium oxalicum 114-2]
GH7.hmm	g2827.t1	g2827	ABN68954.1 exo-cellobiohydrolase [Penicillium decumbens]
GT22.hmm	g2876.t1	g2876	EPS30546.1 putative Dol-P-Man alpha-mannosyltransferase [Penicillium oxalicum 114-2]
GH64.hmm	g2893.t1	g2893	EPS30563.1 putative beta-1,3-glucanase [Penicillium oxalicum 114-2]
CBM20.hmm	g2904.t1	g2904	EPS30575.1 putative glucoamylase [Penicillium oxalicum 114-2]
GH15.hmm	g2904.t1
AA9.hmm	g3006.t1	g3006	AIO06742.1 cellulose monooxygenase [Penicillium oxalicum]
GT2_Chitin_synth_1.hmm	g3082.t1	g3082	EPS30758.1 putative chitin synthase [Penicillium oxalicum 114-2]
GT33.hmm	g31.t1	g31	EPS33100.1 putative GDP-Man: chitobiosyldiphosphodolichol beta-mannosyltransferase [Penicillium oxalicum 114-2]
GT22.hmm	g319.t1	g319	EPS33403.1 putative Dol-P-Man alpha-mannosyltransferase [Penicillium oxalicum 114-2]
AA4.hmm	g3192.t1	g3192	CEJ55218.1 Putative D-lactate dehydrogenase [Penicillium brasilianum]
GT2_Glyco_tranf_2_3.hmm	g3202.t1	g3202	EPS30883.1 putative hyaluronan synthase [Penicillium oxalicum 114-2]
GH47.hmm	g3219.t1	g3219	EPS30899.1 putative alpha-mannosidase [Penicillium oxalicum 114-2]
GH28.hmm	g3290.t1	g3290	EPS30977.1 putative rhamnogalacturonase [Penicillium oxalicum 114-2]
GH2.hmm	g3355.t1	g3355	EPS31044.1 putative beta-mannosidase [Penicillium oxalicum 114-2]
GT50.hmm	g3357.t1	g3357	EPS31046.1 putative Dol-P-Man alpha-1,4-mannosyltransferase [Penicillium oxalicum 114-2]
GH5_7.hmm	g3379.t1	g3379	EPS31069.1 putative beta-1,4-mannanase [Penicillium oxalicum 114-2]
GH75.hmm	g3382.t1	g3382	EPS31072.1 putative chitosanase [Penicillium oxalicum 114-2]
GH71.hmm	g3402.t1	g3402	EPS31664.1 putative alpha-1,3-glucanase [Penicillium oxalicum 114-2]
CBM24.hmm	g3402.t1
GH16.hmm	g3412.t1	g3412	EPS31674.1 putative beta-glucanase [Penicillium oxalicum 114-2]
CE1.hmm	g3429.t1	g3429	EPS31692.1 putative feruloyl esterase [Penicillium oxalicum 114-2]
GH43_6.hmm	g3445.t1	g3445	EPS31708.1 putative alpha-L-arabinofuranosidase [Penicillium oxalicum 114-2]
GT34.hmm	g3489.t1	g3489	EPS31753.1 putative galactosyl transferase [Penicillium oxalicum 114-2]
GH5_23.hmm	g3521.t1	g3521	EPS31785.1 putative exo-beta-1,3-glucanase [Penicillium oxalicum 114-2]
AA9.hmm	g3546.t1	g3546	EPS31810.1 putative cellulose monooxygenase [Penicillium oxalicum 114-2]
GH76.hmm	g3560.t1	g3560	EPS31824.1 putative alpha-1,6-mannanase [Penicillium oxalicum 114-2]
GH28.hmm	g3660.t1	g3660	EPS31932.1 putative exopolygalacturonase [Penicillium oxalicum 114-2]
GH31.hmm	g3708.t1	g3708	EPS31985.1 putative alpha-xylosidase [Penicillium oxalicum 114-2]
GH72.hmm	g3713.t1	g3713	EPS31992.1 putative beta-1,3-glucanosyltransglycosylase [Penicillium oxalicum 114-2]
GH15.hmm	g3728.t1	g3728	EPS32008.1 putative alpha,alpha-trehalase [Penicillium oxalicum 114-2]
GH84.hmm	g3770.t1	g3770	EPS32054.1 putative bifunctional alpha-glucuronidase/N-acetyl beta-glucosaminidase [Penicillium oxalicum 114-2]
GH51.hmm	g3831.t1	g3831	EPS32121.1 putative alpha-L-arabinofuranosidase [Penicillium oxalicum 114-2]
GH6.hmm	g3862.t1	g3862	ADX86895.1 cellobiohydrolase II [Penicillium decumbens]
GH79.hmm	g3875.t1	g3875	EPS32177.1 putative beta-glucuronidase [Penicillium oxalicum 114-2]
GH28.hmm	g3891.t1	g3891	ANS70886.1 endo-polygalacturonase [Penicillium oxalicum]
GH92.hmm	g3966.t1	g3966	EPS32274.1 putative alpha-mannosidase [Penicillium oxalicum 114-2]
GT76.hmm	g397.t1	g397	EPS33485.1 putative Dol-P-Man: alpha-1,6-mannosyltransferase [Penicillium oxalicum 114-2]
PL1_4.hmm	g3990.t1	g3990	EPS32299.1 putative pectin lyase [Penicillium oxalicum 114-2]
GH92.hmm	g4007.t1	g4007	EPS32316.1 putative alpha-mannosidase [Penicillium oxalicum 114-2]
GH13_8.hmm	g4009.t1	g4009	EPS32318.1 putative glycogen branching enzyme [Penicillium oxalicum 114-2]
GH13_8.hmm	g4009.t2
GT15.hmm	g4030.t1	g4030	EPS32339.1 putative alpha-1,2-mannosyltransferase [Penicillium oxalicum 114-2]
GH43_14.hmm	g4064.t1	g4064	EPS32374.1 putative beta-xylosidase/alpha-L-arabinofuranosidase [Penicillium oxalicum 114-2]
GT4.hmm	g4089.t1	g4089	EPS32399.1 putative alpha-mannosyltransferase [Penicillium oxalicum 114-2]
GT71.hmm	g4109.t1	g4109	EPS32421.1 putative alpha-mannosyltransferase [Penicillium oxalicum 114-2]
CE5.hmm	g4200.t1	g4200	EPS32515.1 putative cutinase [Penicillium oxalicum 114-2]
GT15.hmm	g4203.t1	g4203	EPS32518.1 putative alpha-1,2-mannosyltransferase [Penicillium oxalicum 114-2]
GT58.hmm	g4220.t1	g4220	EPS32535.1 putative Dol-P-Man: dolichol pyrophosphate-Man5GlcNAc2 alpha-1,2-mannosyltransferase [Penicillium oxalicum 114-2]
GH16.hmm	g4256.t1	g4256	EPS32571.1 putative chitin glucanosyltransferase [Penicillium oxalicum 114-2]
GH43_30.hmm	g4309.t1	g4309	EPS32625.1 putative alpha-L-arabinofuranosidase [Penicillium oxalicum 114-2]
GH16.hmm	g4356.t1	g4356	EPS32679.1 putative lichenase [Penicillium oxalicum 114-2]
GH18.hmm	g4359.t1	g4359	EPS32682.1 putative chitinase [Penicillium oxalicum 114-2]
GH55.hmm	g4360.t1	g4360	EPS32683.1 putative exo-beta-1,3-glucanase [Penicillium oxalicum 114-2]
PL4_5.hmm	g4375.t1	g4375	EPS32699.1 putative rhamnogalacturonan lyase [Penicillium oxalicum 114-2]
GT62.hmm	g4434.t1	g4434	EPS32760.1 putative alpha-1,2 / alpha-1,6-mannosyltransferase [Penicillium oxalicum 114-2]
GH125.hmm	g4513.t1	g4513	EPS32842.1 hypothetical protein PDE_07803 [Penicillium oxalicum 114-2]
GT57.hmm	g4520.t1	g4520	EPS32849.1 putative Dol-P-Glc: alpha-1,3-glucosyltransferase [Penicillium oxalicum 114-2]
CE4.hmm	g4568.t1	g4568	EPS32900.1 putative chitin deacetylase [Penicillium oxalicum 114-2]
GH62.hmm	g4601.t1	g4601	AVV68824.1 alpha-1,3-arabinofuranosidase [Penicillium oxalicum]
GH7.hmm	g4632.t1	g4632	AEF33952.1 endoglucanases [Penicillium oxalicum]
GH28.hmm	g4641.t1	g4641	EPS32977.1 putative polygalacturonase [Penicillium oxalicum 114-2]
GH7.hmm	g4648.t1	g4648	ACE60553.1 exo-cellobiohydrolase [Penicillium oxalicum]
PL4_3.hmm	g4728.t1	g4728	EPS25073.1 putative rhamnogalacturonan lyase [Penicillium oxalicum 114-2]
GH30_7.hmm	g4738.t1	g4738	EPS25083.1 putative endo-beta-1,4-xylanase [Penicillium oxalicum 114-2]
GH43_36.hmm	g4739.t1	g4739	EPS25084.1 putative alpha-L-arabinofuranosidase [Penicillium oxalicum 114-2]
GH62.hmm	g4740.t1	g4740	AIO06736.1 alpha-L-arabinofuranosidase 2 [Penicillium oxalicum]
GT4.hmm	g4757.t1	g4757	EPS25105.1 putative GDP-Man: alpha-D-mannose-a-(1,6)-phosphatidyl myo-inositol monomannosyltransferase [Penicillium oxalicum 114-2]
GT4.hmm	g4768.t1	g4768	EPS25116.1 putative UDP-GlcNAc: phosphatidylinositol alpha-1,6-N-acetylglucosaminyltransferase [Penicillium oxalicum 114-2]
GH3.hmm	g4770.t1	g4770	AGW24290.1 beta-xylosidase [Penicillium oxalicum]
GH76.hmm	g4771.t1	g4771	EPS25120.1 putative alpha-1,6-mannanase [Penicillium oxalicum 114-2]
GH35.hmm	g4795.t1	g4795	EPS25145.1 putative beta-galactosidase [Penicillium oxalicum 114-2]
GT35.hmm	g4836.t1	g4836	EPS25190.1 putative glycogen/starch phosphorylase [Penicillium oxalicum 114-2]
GT22.hmm	g4943.t1	g4943	EPS25307.1 putative Dol-P-Man alpha-mannosyltransferase [Penicillium oxalicum 114-2]
GH132.hmm	g4951.t1	g4951	EPS25315.1 SUN domain-containing protein [Penicillium oxalicum 114-2]
GH51.hmm	g4979.t1	g4979	EPS25343.1 putative alpha-L-arabinofuranosidase [Penicillium oxalicum 114-2]
GH35.hmm	g4984.t1	g4984	EPS25349.1 putative beta-galactosidase [Penicillium oxalicum 114-2]
AA16.hmm	g5008.t1	g5008	EPS25375.1 chitin binding domain-containing protein [Penicillium oxalicum 114-2]
GH55.hmm	g5010.t1	g5010	EPS25377.1 putative exo-beta-1,3-glucanase [Penicillium oxalicum 114-2]
GH47.hmm	g5033.t1	g5033	EPS25400.1 putative alpha-mannosidase [Penicillium oxalicum 114-2]
GH31.hmm	g5092.t1	g5092	EPS25467.1 putative alpha-glucosidase [Penicillium oxalicum 114-2]
GH16.hmm	g5093.t1	g5093	EPS25468.1 putative chitin glucanosyltransferase [Penicillium oxalicum 114-2]
GH5_5.hmm	g5189.t1	g5189	ABY28340.1 endoglucanase II [Penicillium decumbens]
GH1.hmm	g5251.t1	g5251	AGC10824.1 intracellular beta-glucosidase [Penicillium decumbens]
GH92.hmm	g5263.t1	g5263	EPS25657.1 putative alpha-mannosidase [Penicillium oxalicum 114-2]
GH76.hmm	g5272.t1	g5272	EPS25666.1 putative alpha-1,6-mannanase [Penicillium oxalicum 114-2]
GH17.hmm	g5287.t1	g5287	EPS25681.1 putative beta-1,3-glucanosyltransferase [Penicillium oxalicum 114-2]
CE4.hmm	g5316.t1	g5316	EPS25713.1 putative peptidoglycan N-acetylglucosamine deacetylase [Penicillium oxalicum 114-2]
GT90.hmm	g5355.t1	g5355	EPS25753.1 putative UDP-Xyl: (mannosyl) glucuronoxylomannan/galactoxylomannan beta-1,2-xylosyltransferase [Penicillium oxalicum 114-2]
AA9.hmm	g5364.t1	g5364	EPS25762.1 putative cellulose monooxygenase [Penicillium oxalicum 114-2]
GT2_Chitin_synth_2.hmm	g5368.t1	g5368	EPS25766.1 putative chitin synthase [Penicillium oxalicum 114-2]
GH55.hmm	g5391.t1	g5391	EPS25791.1 putative endo-beta-1,3-glucanase [Penicillium oxalicum 114-2]
GH92.hmm	g54.t1	g54	EPS33123.1 putative alpha-mannosidase [Penicillium oxalicum 114-2]
GH10.hmm	g5414.t1	g5414	EPS25816.1 putative endo-beta-1,4-xylanase [Penicillium oxalicum 114-2]
GT20.hmm	g5552.t1	g5552	EPS25955.1 putative alpha,alpha-trehalose-phosphate synthase [UDP-forming] [Penicillium oxalicum 114-2]
GT39.hmm	g5566.t1	g5566	EPS25969.1 putative Dol-P-Man: protein alpha-mannosyltransferase [Penicillium oxalicum 114-2]
GT66.hmm	g5577.t1	g5577	EPS25981.1 putative Dol-PP-alpha-oligosaccharide: protein beta-oligosaccharyltransferase [Penicillium oxalicum 114-2]
CE9.hmm	g5620.t1	g5620	EPS26029.1 putative N-acetyl-glucosamine-6-phosphate deacetylase [Penicillium oxalicum 114-2]
GH3.hmm	g5625.t1	g5625	EPS26034.1 putative beta-N-acetylhexosaminidase [Penicillium oxalicum 114-2]
GH32.hmm	g5691.t1	g5691	EPS26105.1 putative invertase [Penicillium oxalicum 114-2]
GT32.hmm	g5749.t1	g5749	EPS26165.1 putative alpha-1,6-mannosyltransferase [Penicillium oxalicum 114-2]
GH18.hmm	g5781.t1	g5781	EPS26232.1 putative chitinase [Penicillium oxalicum 114-2]
GH13_1.hmm	g5811.t1	g5811	AVQ10353.1 alpha-amylase Amy13 [Penicillium oxalicum]
CBM20.hmm	g5811.t1
GT4.hmm	g5854.t1	g5854	EPS26311.1 putative trehalose phosphorylase [Penicillium oxalicum 114-2]
GH25.hmm	g5869.t1	g5869	EPS28350.1 putative lysozyme [Penicillium oxalicum 114-2]
CE5.hmm	g5871.t1	g5871	EPS28348.1 putative cutinase [Penicillium oxalicum 114-2]
GH16.hmm	g5874.t1	g5874	EPS28345.1 putative beta-1,3-glucanase [Penicillium oxalicum 114-2]
CE12.hmm	g5876.t1	g5876	EPS28343.1 putative pectin acetylesterase [Penicillium oxalicum 114-2]
GH28.hmm	g5946.t1	g5946	EPS28272.1 putative polygalacturonase [Penicillium oxalicum 114-2]
GH2.hmm	g595.t1	g595	EPS33697.1 putative beta-galactosidase [Penicillium oxalicum 114-2]
GH5_31.hmm	g5964.t1	g5964	EPS28253.1 putative beta-1,3-mannanase [Penicillium oxalicum 114-2]
GT2_Chitin_synth_2.hmm	g597.t1	g597	EPS33699.1 putative chitin synthase [Penicillium oxalicum 114-2]
GT2_Chitin_synth_2.hmm	g598.t1	g598	EPS33700.1 putative chitin synthase [Penicillium oxalicum 114-2]
GH43_14.hmm	g5.t1	g5	EPS33074.1 putative beta-xylosidase/alpha-L-arabinofuranosidase [Penicillium oxalicum 114-2]
GH13_22.hmm	g6054.t1	g6054	EPS28157.1 putative alpha-1,3-glucan synthase [Penicillium oxalicum 114-2]
GT59.hmm	g6076.t1	g6076	EPS28133.1 putative Dol-P-Glc: Glc2Man9GlcNAc2-PP-Dol alpha-1,2-glucosyltransferase [Penicillium oxalicum 114-2]
GH18.hmm	g6100.t1	g6100	EPS28109.1 putative chitinase [Penicillium oxalicum 114-2]
GH31.hmm	g6143.t1	g6143	EPS28064.1 putative alpha-xylosidase [Penicillium oxalicum 114-2]
GT90.hmm	g6160.t1	g6160	EPS28045.1 putative UDP-Xyl: (mannosyl) glucuronoxylomannan/galactoxylomannan beta-1,2-xylosyltransferase [Penicillium oxalicum 114-2]
GH16.hmm	g6161.t1	g6161	EPS28044.1 putative beta-1,3-1,4-glucanase [Penicillium oxalicum 114-2]
GH3.hmm	g6238.t1	g6238	EPS27960.1 putative beta-glucosidase [Penicillium oxalicum 114-2]
GH88.hmm	g6242.t1	g6242	EPS27957.1 putative d-4,5 unsaturated beta-glucuronyl hydrolase [Penicillium oxalicum 114-2]
GH12.hmm	g6256.t1	g6256	AJA40324.1 xyloglucan-specific endo-beta-D-1,4-glucanase [Penicillium oxalicum]
GH81.hmm	g6278.t1	g6278	EPS27918.1 putative endo-beta-1,3-glucanase [Penicillium oxalicum 114-2]
GH10.hmm	g63.t1	g63	ADX86896.1 glycoside hydrolase family 10 xylanase [Penicillium decumbens]
GH2.hmm	g6338.t1	g6338	EPS27857.1 putative beta-glucuronidase [Penicillium oxalicum 114-2]
GH5_9.hmm	g6339.t1	g6339	EPS27856.1 putative exo-beta-1,3-glucanase [Penicillium oxalicum 114-2]
GT8.hmm	g6379.t1	g6379	EPS27816.1 putative glycogenin [Penicillium oxalicum 114-2]
GT90.hmm	g6381.t1	g6381	EPS27814.1 putative UDP-Xyl: (mannosyl) glucuronoxylomannan/galactoxylomannan beta-1,2-xylosyltransferase [Penicillium oxalicum 114-2]
GH3.hmm	g6403.t1	g6403	ADB82653.1 beta-glucosidase I [Penicillium decumbens]
GH28.hmm	g6448.t1	g6448	EPS27745.1 putative rhamnogalacturonan alpha-L-rhamnopyranohydrolase [Penicillium oxalicum 114-2]
GH78.hmm	g6449.t1	g6449	EPS27744.1 putative alpha-L-rhamnosidase [Penicillium oxalicum 114-2]
GH11.hmm	g6455.t1	g6455	EPS27738.1 putative endo-beta-1,4-xylanase [Penicillium oxalicum 114-2]
GH31.hmm	g6488.t1	g6488	EPS27704.1 putative alpha-glucosidase [Penicillium oxalicum 114-2]
GT4.hmm	g6549.t1	g6549	EPS27641.1 putative alpha-mannosyltransferase [Penicillium oxalicum 114-2]
GH53.hmm	g6551.t1	g6551	EPS27639.1 putative endo-beta-1,4-galactanase [Penicillium oxalicum 114-2]
GH47.hmm	g6583.t1	g6583	EPS27605.1 putative alpha-mannosidase [Penicillium oxalicum 114-2]
GH35.hmm	g6599.t1	g6599	EPS27589.1 putative beta-galactosidase [Penicillium oxalicum 114-2]
GH27.hmm	g6619.t1	g6619	EPS27571.1 putative alpha-galactosidase [Penicillium oxalicum 114-2]
GH47.hmm	g6648.t1	g6648	EPS27542.1 putative alpha-mannosidase [Penicillium oxalicum 114-2]
CE4.hmm	g6663.t1	g6663	EPS27527.1 putative chitin deacetylase [Penicillium oxalicum 114-2]
GH75.hmm	g667.t1	g667	EPS33771.1 putative chitosanase [Penicillium oxalicum 114-2]
GH5_9.hmm	g670.t1	g670	EPS33775.1 putative exo-beta-1,3-glucanase [Penicillium oxalicum 114-2]
GH10.hmm	g6711.t1	g6711	ADW66245.1 endo-beta-1,4-xylanase [Talaromyces aerugineus]
GH3.hmm	g6716.t1	g6716	EPS27470.1 putative beta-xylosidase [Penicillium oxalicum 114-2]
GH78.hmm	g6732.t1	g6732	EPS27453.1 putative alpha-L-rhamnosidase [Penicillium oxalicum 114-2]
GT39.hmm	g6779.t1	g6779	EPS27403.1 putative Dol-P-Man: protein alpha-mannosyltransferase [Penicillium oxalicum 114-2]
GT22.hmm	g6862.t1	g6862	EPS27307.1 putative Dol-P-Man alpha-mannosyltransferase [Penicillium oxalicum 114-2]
GH55.hmm	g6890.t1	g6890	EPS27276.1 putative exo-beta-1,3-glucanase [Penicillium oxalicum 114-2]
GH43_13.hmm	g6942.t1	g6942	EPS27222.1 putative beta-xylosidase [Penicillium oxalicum 114-2]
GH71.hmm	g6985.t1	g6985	KAE8165408.1 glycosyl hydrolase family 71-domain-containing protein [Aspergillus tamarii]
GH3.hmm	g6.t1	g6	EPS33075.1 putative beta-xylosidase [Penicillium oxalicum 114-2]
GH27.hmm	g7070.t1	g7070	EPS28455.1 putative alpha-galactosidase [Penicillium oxalicum 114-2]
GH72.hmm	g7117.t1	g7117	EPS28506.1 putative beta-1,3-glucanosyltransglycosylase [Penicillium oxalicum 114-2]
GH28.hmm	g7130.t1	g7130	EPS28520.1 putative rhamnogalacturonase [Penicillium oxalicum 114-2]
GH3.hmm	g7148.t1	g7148	EPS28539.1 putative beta-glucosidase [Penicillium oxalicum 114-2]
GH63.hmm	g7205.t1	g7205	EPS28596.1 putative alpha-glucosidase [Penicillium oxalicum 114-2]
GH67.hmm	g7235.t1	g7235	EPS28626.1 putative alpha-glucuronidase [Penicillium oxalicum 114-2]
GH30_7.hmm	g7236.t1	g7236	EPS28627.1 putative endo-beta-1,4-xylanase [Penicillium oxalicum 114-2]
GT71.hmm	g7266.t1	g7266	EPS28658.1 putative alpha-mannosyltransferase [Penicillium oxalicum 114-2]
GH78.hmm	g7280.t1	g7280	EPS28672.1 putative alpha-L-rhamnosidase [Penicillium oxalicum 114-2]
GH2.hmm	g734.t1	g734	EPS33842.1 putative beta-mannosidase [Penicillium oxalicum 114-2]
GT1.hmm	g7351.t1	g7351	EPS28746.1 putative glycosyl transferase [Penicillium oxalicum 114-2]
CE8.hmm	g735.t1	g735	EPS33843.1 putative pectin methylesterase [Penicillium oxalicum 114-2]
GH5_5.hmm	g7368.t1	g7368	EPS28765.1 putative endo-beta-1,4-glucanase [Penicillium oxalicum 114-2]
CE16.hmm	g7498.t1	g7498	EPS28903.1 putative carbohydrate acetylesterase [Penicillium oxalicum 114-2]
GH31.hmm	g7608.t1	g7608	EPS29020.1 putative alpha-glucosidase [Penicillium oxalicum 114-2]
GH2.hmm	g7726.t1	g7726	EPS29171.1 putative beta-galactosidase [Penicillium oxalicum 114-2]
GH13_40.hmm	g7753.t1	g7753	EPS29202.1 putative alpha-glucosidase [Penicillium oxalicum 114-2]
GH114.hmm	g7756.t1	g7756	EPS29205.1 putative endo-alpha-1,4-polygalactosaminidase [Penicillium oxalicum 114-2]
GT69.hmm	g7760.t1	g7760	EPS29209.1 putative GDP-Man: alpha-1,3-mannosyltransferase [Penicillium oxalicum 114-2]
GH28.hmm	g7764.t1	g7764	APZ75903.1 endo-polygalacturonase [Penicillium oxalicum]
CE5.hmm	g7782.t1	g7782	EPS29233.1 putative acetyl xylan esterase [Penicillium oxalicum 114-2]
GH3.hmm	g7852.t1	g7852	EPS29302.1 putative beta-glucosidase [Penicillium oxalicum 114-2]
GH5_15.hmm	g7902.t1	g7902	EPS29361.1 putative beta-1,6-glucanase [Penicillium oxalicum 114-2]
GH71.hmm	g7971.t1	g7971	EPS29432.1 putative alpha-1,3-glucanase [Penicillium oxalicum 114-2]
GT69.hmm	g7990.t1	g7990	EPS29451.1 putative GDP-Man: alpha-1,3-mannosyltransferase [Penicillium oxalicum 114-2]
GH93.hmm	g7.t1	g7	EPS33076.1 putative exo-alpha-L-1,5-arabinanase [Penicillium oxalicum 114-2]
GH75.hmm	g8028.t1	g8028	EPS26319.1 putative chitosanase [Penicillium oxalicum 114-2]
GH76.hmm	g8029.t1	g8029	EPS26320.1 putative alpha-1,6-mannanase [Penicillium oxalicum 114-2]
AA9.hmm	g8034.t1	g8034	EPS26325.1 putative cellulose monooxygenase [Penicillium oxalicum 114-2]
GT90.hmm	g8036.t1	g8036	EPS26328.1 putative UDP-Xyl: (mannosyl) glucuronoxylomannan/galactoxylomannan beta-1,2-xylosyltransferase [Penicillium oxalicum 114-2]
GH1.hmm	g8049.t1	g8049	EPS26341.1 putative beta-glucosidase [Penicillium oxalicum 114-2]
GH76.hmm	g8051.t1	g8051	EPS26343.1 putative alpha-1,6-mannanase [Penicillium oxalicum 114-2]
GH2.hmm	g8052.t1	g8052	EPS26344.1 putative exo-beta-glucosaminidase [Penicillium oxalicum 114-2]
GH105.hmm	g8057.t1	g8057	EPS26350.1 putative unsaturated rhamnogalacturonyl hydrolase [Penicillium oxalicum 114-2]
CE2.hmm	g8072.t1	g8072	EPS26366.1 putative acetyl xylan esterase [Penicillium oxalicum 114-2]
GH55.hmm	g8107.t1	g8107	EPS26403.1 putative endo-beta-1,3-glucanase [Penicillium oxalicum 114-2]
AA13.hmm	g8121.t1	g8121	EPS26418.1 starch binding domain- and chitin binding domain-containing protein [Penicillium oxalicum 114-2]
PL4_1.hmm	g8149.t1	g8149	EPS26448.1 putative rhamnogalacturonan lyase [Penicillium oxalicum 114-2]
GH65.hmm	g8166.t1	g8166	EPS26466.1 putative alpha,alpha-trehalase [Penicillium oxalicum 114-2]
GT20.hmm	g8174.t1	g8174	EPS26474.1 putative alpha,alpha-trehalose-phosphate synthase [UDP-forming] [Penicillium oxalicum 114-2]
PL1_4.hmm	g8225.t1	g8225	EPS26530.1 putative pectin lyase [Penicillium oxalicum 114-2]
GH43_25.hmm	g8226.t1	g8226	EPS26531.1 putative exo-beta-1,3-galactanase [Penicillium oxalicum 114-2]
GT20.hmm	g8272.t1	g8272	EPS26584.1 putative alpha,alpha-trehalose-phosphate synthase [UDP-forming] [Penicillium oxalicum 114-2]
CE8.hmm	g8279.t1	g8279	EPS26592.1 putative pectin methylesterase [Penicillium oxalicum 114-2]
GH3.hmm	g8312.t1	g8312	EPS26627.1 putative beta-glucosidase [Penicillium oxalicum 114-2]
GH18.hmm	g8320.t1	g8320	EPS26635.1 putative chitinase [Penicillium oxalicum 114-2]
GT39.hmm	g8332.t1	g8332	EPS26646.1 putative Dol-P-Man: protein alpha-mannosyltransferase [Penicillium oxalicum 114-2]
GH76.hmm	g8368.t1	g8368	EPS26684.1 putative alpha-1,6-mannanase [Penicillium oxalicum 114-2]
GH114.hmm	g8385.t1	g8385	EPS26701.1 putative endo-alpha-1,4-polygalactosaminidase [Penicillium oxalicum 114-2]
GT57.hmm	g8404.t1	g8404	EPS26720.1 putative Dol-P-Glc: alpha-1,3-glucosyltransferase [Penicillium oxalicum 114-2]
CE8.hmm	g8419.t1	g8419	EPS26736.1 putative pectin methylesterase [Penicillium oxalicum 114-2]
GT71.hmm	g8428.t1	g8428	EPS26746.1 putative alpha-mannosyltransferase [Penicillium oxalicum 114-2]
GT34.hmm	g8430.t1	g8430	EPS26748.1 putative galactosyl transferase [Penicillium oxalicum 114-2]
GH16.hmm	g8433.t1	g8433	EPS26751.1 putative chitin glucanosyltransferase [Penicillium oxalicum 114-2]
GH43_6.hmm	g8493.t1	g8493	EPS26811.1 putative alpha-L-arabinofuranosidase [Penicillium oxalicum 114-2]
GH13_40.hmm	g8499.t1	g8499	EPS26817.1 putative alpha-glucosidase [Penicillium oxalicum 114-2]
CE4.hmm	g8519.t1	g8519	EPS26836.1 putative peptidoglycan N-acetylglucosamine deacetylase [Penicillium oxalicum 114-2]
GH18.hmm	g8523.t1	g8523	EPS26840.1 putative chitinase [Penicillium oxalicum 114-2]
GT69.hmm	g857.t1	g857	EPS33966.1 putative GDP-Man: alpha-1,3-mannosyltransferase [Penicillium oxalicum 114-2]
GT2_Chitin_synth_2.hmm	g8596.t1	g8596	EPS26916.1 putative chitin synthase [Penicillium oxalicum 114-2]
GH5_12.hmm	g8613.t1	g8613	EPS26933.1 putative endoglycoceramidase [Penicillium oxalicum 114-2]
GH28.hmm	g8634.t1	g8634	EPS26956.1 putative exopolygalacturonase [Penicillium oxalicum 114-2]
GH79.hmm	g8686.t1	g8686	EPS27008.1 putative beta-glucuronidase [Penicillium oxalicum 114-2]
GH38.hmm	g8696.t1	g8696	EPS27018.1 putative alpha-mannosidase [Penicillium oxalicum 114-2]
GT1.hmm	g8703.t1	g8703	EPS27025.1 putative UDP-galactose:ceramide 1-beta-galactosyltransferase [Penicillium oxalicum 114-2]
GH30_3.hmm	g8737.t1	g8737	EPS27063.1 putative beta-1,6-glucanase [Penicillium oxalicum 114-2]
GT2_Chitin_synth_1.hmm	g8815.t1	g8815	KAF3390323.1 Chitin synthase G [Penicillium rolfsii]
CE12.hmm	g8823.t1	g8823	EPS27150.1 putative rhamnogalacturonan acetylesterase [Penicillium oxalicum 114-2]
GH89.hmm	g8830.t1	g8830	EPS27157.1 putative alpha-N-acetylglucosaminidase [Penicillium oxalicum 114-2]
GH11.hmm	g8831.t1	g8831	E7EF85.1 RecName: Full=Endo-1,4-beta-xylanase B; Short=Xylanase B; AltName: Full=1,4-beta-D-xylan xylanohydrolase B; Flags: Precursor [Penicillium oxalicum]
GH3.hmm	g8838.t1	g8838	EPS27165.1 putative beta-glucosidase [Penicillium oxalicum 114-2]
GH18.hmm	g8853.t1	g8853	XP_031896391.1 glycoside hydrolase superfamily [Aspergillus alliaceus]
GH18.hmm	g88.t1	g88	AVQ10350.1 endochitinase [Penicillium oxalicum]
GH30_5.hmm	g8915.t1	g8915	EPS31103.1 putative endo-beta-1,6-galactanase [Penicillium oxalicum 114-2]
GH43_29.hmm	g8921.t1	g8921	AIO06737.1 alpha-L-arabinofuranosidase 3 [Penicillium oxalicum]
CBM6.hmm	g8921.t1
PL1_7.hmm	g8922.t1	g8922	EPS31113.1 putative pectate lyase [Penicillium oxalicum 114-2]
GH43_6.hmm	g897.t1	g897	EPS34010.1 putative alpha-L-arabinofuranosidase [Penicillium oxalicum 114-2]
GT62.hmm	g8992.t1	g8992	EPS31186.1 putative alpha-1,2 / alpha-1,6-mannosyltransferase [Penicillium oxalicum 114-2]
GH32.hmm	g9007.t1	g9007	AJY58099.1 beta-fructofuranosidase [Penicillium oxalicum]
GH43_1.hmm	g9134.t1	g9134	EPS31351.1 putative beta-xylosidase [Penicillium oxalicum 114-2]
GH16.hmm	g914.t1	g914	EPS34028.1 putative chitin glucanosyltransferase [Penicillium oxalicum 114-2]
GH71.hmm	g9155.t1	g9155	EPS31375.1 putative alpha-1,3-glucanase [Penicillium oxalicum 114-2]
GT34.hmm	g9185.t1	g9185	EPS31406.1 putative galactosyl transferase [Penicillium oxalicum 114-2]
GH3.hmm	g9220.t1	g9220	EPS31445.1 putative beta-N-acetylhexosaminidase [Penicillium oxalicum 114-2]
GT1.hmm	g9227.t1	g9227	EPS31451.1 putative UDP-Glc: sterol glucosyltransferase [Penicillium oxalicum 114-2]
GT2_Chitin_synth_2.hmm	g9242.t1	g9242	EPS31466.1 putative chitin synthase [Penicillium oxalicum 114-2]
GH26.hmm	g9259.t1	g9259	EPS31483.1 putative beta-1,4-mannanase [Penicillium oxalicum 114-2]
GH12.hmm	g9260.t1	g9260	EPS31484.1 putative endo-beta-1,4-glucanase [Penicillium oxalicum 114-2]
GH17.hmm	g9261.t1	g9261	EPS31486.1 putative beta-1,3-glucanosyltransferase [Penicillium oxalicum 114-2]
GH78.hmm	g9271.t1	g9271	EPS31496.1 putative alpha-L-rhamnosidase [Penicillium oxalicum 114-2]
GH18.hmm	g9314.t1	g9314	EPS31542.1 putative chitinase [Penicillium oxalicum 114-2]
GH20.hmm	g9326.t1	g9326	EPS31556.1 putative beta-1,6-N-acetylglucosaminidase [Penicillium oxalicum 114-2]
GH18.hmm	g9374.t1	g9374	EPS31611.1 putative chitinase [Penicillium oxalicum 114-2]
GH12.hmm	g937.t1	g937	EPS34052.1 putative endo-beta-1,4-glucanase [Penicillium oxalicum 114-2]
GT2_Glyco_tranf_2_3.hmm	g939.t1	g939	EPS34054.1 putative cellulose synthase [Penicillium oxalicum 114-2]
GT1.hmm	g9401.t1	g9401	EPS31645.1 putative UDP-Glc: sterol glucosyltransferase [Penicillium oxalicum 114-2]
GH3.hmm	g942.t1	g942	EPS34057.1 putative beta-glucosidase [Penicillium oxalicum 114-2]
GT32.hmm	g944.t1	g944	EPS34059.1 putative alpha-1,6-mannosyltransferase [Penicillium oxalicum 114-2]
